# Supplementary material
Source: PubMed Central journal article supplement (PMC3080048)
Supplement: NIHMS268102-supplement-1_si_001.pdf [file NIHMS268102-supplement-1_si_001.pdf]

## I. 1. PROGRAMMING DETAILS

The program is written in fortran 77. Its code and manual are available for download at <http://www.chem.duke.edu/~yang/software.html>

### A. Input

The input is keyword oriented and free-format. A maximum dimension is defined for the number of atoms that can be analyzed. Currently, up to 500 atoms are supported from SCF densities, and up to 10000 for promolecular densities.

The following notation is used for variables within the input specification:

- $r$  stands for real.
- $x,y,z$  stand for positions in space (real)
- $n$  stands for integer
- `name` stands for any character string

Comments must be preceded by `#`

#### *a. Required input*

- The first line must contain the number of files to be analyzed. Currently, from 1 to 3 files are supported for xyz files, so that, if interactions between different molecules are to be analyzed, the molecules can be uploaded in different files. Only one wfn file can be analyzed at one time.
- The second line must contain the name of the molecular file. It accepts two different types of file format, depending on the level of approximation. They must have the following extensions, depending on the desired calculation:
  - `name.xyz` coordinate specification in the xyz format (Promolecular approximation), recommended for large systems [default]
  - `name.wfn` wavefunction file in the AIMPAC WFN format (SCF calculation)

b. *Optional keywords (in order)*

- **LIGAND n r**

**n** is the number of the file (in the order of introduction in the input) and **r** is a distance in Å. This option will only plot intermolecular interactions within a radius **r** of file #**n**. This option is especially designed for protein-ligand interactions and is only available for promolecular densities.

- **INTERMOLECULAR r**

**r** may vary from 0 to 1. For good results, **r** should be in the range 0.8-0.95. This option will eliminate all interactions where at least a fraction **r** of the density at a point in space comes from a single molecule. This enables only intermolecular, and not intramolecular, interactions to be plotted. The default is set so that an interaction is discarded if 0.95 of the density at each point comes from a single molecule. Note that this option is only available for promolecular densities.

- **RADIUS x y z r**

**x y z** determine the position around which interactions are represented for a radius **r** (all in Å)

- **ONAME name**

**name** is the string to be passed for use as the output file names (otherwise the default is taken from the input file name). The name used will be output in capital letters.

- **OUTPUT n**, where **n** is an integer running from 1 to 3.

- 1 will only print the .dat file
- 2 will only print the .cube files
- 3 will print all three output files [default]

- **CUBE x0 y0 z0 x1 y1 z1**

This option will set the cube within which NCI is analyzed (atomic units). The lower left corner of the cube is located at the Cartesian coordinate (**x0,y0,z0**) and the top right corner is at (**x1,y1,z1**). The default is produced in terms of molecular

coordinates. In order to ensure a correct cube in planar or linear molecules, a minimum distance of  $\pm 2$  a.u. is added to the axes in all directions.

- **INCREMENTS** *r1 r2 r3* This option sets the increments along the *x,y,z* directions of the cube (atomic units). The default is set to 0.1,0.1,0.1

- **CUTOFFS** *r1 r2*

Density (*r1*) and RDG (*r2*) cutoffs used to create the dat file. The default density cutoff is set to 0.2. The RDG cutoff depends on the level of calculation:

- In the promolecular case it is set to 1.0.
- In the SCF case it is set to 2.0.

- **CUTPLOT** *r1 r2*

Density (*r1*) and RDG (*r2*) cutoffs used when creating the cube files. *r1* will set the density cutoff that must be met for the RDG to be registered in the cube files, whereas *r2* will be used in the VMD script for the plotting of isosurfaces. The default values are:

- In the promolecular case: *r1*=0.07, *r2*=0.3.
- In the SCF case: *r1*=0.05, *r2*=0.5.

## B. Output

The NCI output thus consists of 4 files:

- a data file that collects  $\rho$  vs *s* values
- a cube file with *s'* values (only *s* values above the cutoff are collected)
- a cube file with  $\text{sign}(\lambda_2)\rho$
- a script for visualization of the results in vmd, subject to the cutoffs used in the run.

## II. INPUTS FOR THE EXAMPLES

This section collects the inputs necessary to reproduce the results of the paper. They include both the input for NCIPLLOT and the geometry used. In the case of SCF calculation, the geometry is provided as it appears in the wfn file. In the promolecular case, the XYZ file is given. If the geometry is already available in the literature, the source is provided.

### A. S-S bond in S<sub>4</sub>N<sub>4</sub>

#### Calculation details

Method: B3LYP

Basis set: 6-31G\*

#### 1. Boat

#### Input

|               |
|---------------|
| 1<br>boat.wfn |
|---------------|

#### Geometry

Geometry taken from: Pritchina, E. A.; Gritsan, N. P.; Zibarev, A. V.; Bally, T. *Inorganic Chemistry* **2009**, *48*, 4075.

|   |   |            |             |             |             |               |
|---|---|------------|-------------|-------------|-------------|---------------|
| N | 1 | (CENTRE 1) | 2.14447607  | -2.43213755 | 0.00000000  | CHARGE = 7.0  |
| N | 2 | (CENTRE 2) | 0.29551853  | 3.46824219  | 0.00000000  | CHARGE = 7.0  |
| N | 3 | (CENTRE 3) | -0.62783827 | -0.17448644 | 3.65514230  | CHARGE = 7.0  |
| N | 4 | (CENTRE 4) | -0.62783827 | -0.17448644 | -3.65514230 | CHARGE = 7.0  |
| S | 5 | (CENTRE 5) | 0.36876869  | -2.83230297 | 2.55367196  | CHARGE = 16.0 |
| S | 6 | (CENTRE 6) | 0.36876869  | -2.83230297 | -2.55367196 | CHARGE = 16.0 |
| S | 7 | (CENTRE 7) | -0.62783827 | 2.68199289  | -2.80793650 | CHARGE = 16.0 |
| S | 8 | (CENTRE 8) | -0.62783827 | 2.68199289  | 2.80793650  | CHARGE = 16.0 |

## 2. Cage

### Input

```
1
cage.wfn
```

### Geometry

Geometry taken from: Pritchina, E. A.; Gritsan, N. P.; Zibarev, A. V.; Bally, T. *Inorganic Chemistry* **2009**, *48*, 4075.

|   |   |            |             |             |             |               |
|---|---|------------|-------------|-------------|-------------|---------------|
| N | 1 | (CENTRE 1) | 2.47571131  | 2.47571131  | 0.00000000  | CHARGE = 7.0  |
| N | 2 | (CENTRE 2) | -2.47571131 | 2.47571131  | 0.00000000  | CHARGE = 7.0  |
| N | 3 | (CENTRE 3) | -2.47571131 | -2.47571131 | 0.00000000  | CHARGE = 7.0  |
| N | 4 | (CENTRE 4) | 2.47571131  | -2.47571131 | 0.00000000  | CHARGE = 7.0  |
| S | 5 | (CENTRE 5) | 0.00000000  | 2.59961498  | 1.84258125  | CHARGE = 16.0 |
| S | 6 | (CENTRE 6) | -2.59961498 | 0.00000000  | -1.84258125 | CHARGE = 16.0 |
| S | 7 | (CENTRE 7) | 0.00000000  | -2.59961498 | 1.84258125  | CHARGE = 16.0 |
| S | 8 | (CENTRE 8) | 2.59961498  | 0.00000000  | -1.84258125 | CHARGE = 16.0 |

### B. Metal complexes: along Hg series

#### Calculation details

Method: B3LYP

Basis set: SDD for Hg, 6-31++G\*\* for the ligands

1.  $[Hg(H_2O)_3]^{2+}$

### Input

```
1
hghoh3.wfn
```

## Geometry

|    |    |             |             |             |             |               |
|----|----|-------------|-------------|-------------|-------------|---------------|
| Hg | 1  | (CENTRE 1)  | -0.09271993 | -0.21375982 | 0.00419875  | CHARGE = 20.0 |
| O  | 2  | (CENTRE 2)  | -4.18390197 | -0.42267499 | -0.08472427 | CHARGE = 8.0  |
| H  | 3  | (CENTRE 3)  | -5.24420024 | 0.67915034  | 0.94936888  | CHARGE = 1.0  |
| H  | 4  | (CENTRE 4)  | -5.09124849 | -1.99525591 | -0.41987790 | CHARGE = 1.0  |
| O  | 5  | (CENTRE 5)  | 3.67654291  | -1.86909391 | 0.06484495  | CHARGE = 8.0  |
| H  | 6  | (CENTRE 6)  | 3.98657702  | -3.67767805 | 0.26289841  | CHARGE = 1.0  |
| H  | 7  | (CENTRE 7)  | 5.07428067  | -1.11487402 | -0.87463946 | CHARGE = 1.0  |
| O  | 8  | (CENTRE 8)  | 1.25020912  | 3.94010262  | -0.02780957 | CHARGE = 8.0  |
| H  | 9  | (CENTRE 9)  | 0.77384130  | 5.19667456  | -1.28543005 | CHARGE = 1.0  |
| H  | 10 | (CENTRE 10) | 1.97554381  | 4.82609920  | 1.41329105  | CHARGE = 1.0  |

2.  $[Hg(F)_3]^-$

## Input

```
1
HgF3.wfn
```

## Geometry

|    |   |            |             |             |             |               |
|----|---|------------|-------------|-------------|-------------|---------------|
| Hg | 1 | (CENTRE 1) | 0.00274765  | -0.00613533 | -0.00002901 | CHARGE = 20.0 |
| F  | 2 | (CENTRE 2) | -0.66374794 | 3.96404083  | 0.00008485  | CHARGE = 9.0  |
| F  | 3 | (CENTRE 3) | 3.78129357  | -1.39417921 | 0.00008676  | CHARGE = 9.0  |
| F  | 4 | (CENTRE 4) | -3.14196915 | -2.51532535 | 0.00008626  | CHARGE = 9.0  |

3.  $[Hg(Cl)_3]^-$

## Input

```
1
HgCl3.wfn
```

## Geometry

|    |   |            |             |             |             |               |
|----|---|------------|-------------|-------------|-------------|---------------|
| Hg | 1 | (CENTRE 1) | 0.00658792  | -0.01360068 | -0.00016745 | CHARGE = 20.0 |
| Cl | 2 | (CENTRE 2) | -0.69821368 | 4.64157150  | 0.00025851  | CHARGE = 17.0 |
| Cl | 3 | (CENTRE 3) | 4.38967792  | -1.70098222 | 0.00026587  | CHARGE = 17.0 |
| Cl | 4 | (CENTRE 4) | -3.72246622 | -2.87658607 | 0.00026364  | CHARGE = 17.0 |

4.  $[Hg(Br)_3]^-$

## Input

```
1
HgBr3.wfn
```

## Geometry

|    |   |            |             |             |             |               |
|----|---|------------|-------------|-------------|-------------|---------------|
| Hg | 1 | (CENTRE 1) | 0.00471421  | -0.00268653 | -0.00015930 | CHARGE = 20.0 |
| Br | 2 | (CENTRE 2) | 4.92465831  | -0.32089631 | 0.00012180  | CHARGE = 35.0 |
| Br | 3 | (CENTRE 3) | -2.18721415 | 4.41903634  | 0.00012098  | CHARGE = 35.0 |
| Br | 4 | (CENTRE 4) | -2.74821948 | -4.09199939 | 0.00012134  | CHARGE = 35.0 |

## C. $BH_3NH_3$ and the dihydrogen bond

### Calculation details

Method: B3LYP

Basis set: 6-31G\*

#### 1. Gas-phase geometry

Optimization: Full

## Input

```
1
diHB-B3LYP.wfn
```

## Geometry

|   |    |             |             |             |             |              |
|---|----|-------------|-------------|-------------|-------------|--------------|
| B | 1  | (CENTRE 1)  | -0.01488593 | 3.36268955  | -2.66219498 | CHARGE = 5.0 |
| H | 2  | (CENTRE 2)  | 1.89147870  | 2.10623554  | -2.34229548 | CHARGE = 1.0 |
| H | 3  | (CENTRE 3)  | -1.91373108 | 2.09957575  | -2.32362575 | CHARGE = 1.0 |
| H | 4  | (CENTRE 4)  | -0.02643338 | 4.43154308  | -4.67776626 | CHARGE = 1.0 |
| N | 5  | (CENTRE 5)  | -0.00827884 | 5.48391306  | -0.44315913 | CHARGE = 7.0 |
| H | 6  | (CENTRE 6)  | 0.00240783  | 4.65636332  | 1.33078996  | CHARGE = 1.0 |
| H | 7  | (CENTRE 7)  | -1.56355038 | 6.62076684  | -0.54259965 | CHARGE = 1.0 |
| H | 8  | (CENTRE 8)  | 1.54159877  | 6.62667230  | -0.55791006 | CHARGE = 1.0 |
| B | 9  | (CENTRE 9)  | 0.04192809  | 1.80936252  | 4.48636635  | CHARGE = 5.0 |
| H | 10 | (CENTRE 10) | 1.95964652  | 2.91310447  | 3.82319206  | CHARGE = 1.0 |
| H | 11 | (CENTRE 11) | -1.88396404 | 2.92680093  | 3.87121362  | CHARGE = 1.0 |
| H | 12 | (CENTRE 12) | 0.06772139  | 1.34214654  | 6.71830295  | CHARGE = 1.0 |
| N | 13 | (CENTRE 13) | 0.01343331  | -0.84567352 | 2.94732020  | CHARGE = 7.0 |
| H | 14 | (CENTRE 14) | -0.01122461 | -0.57326863 | 1.03540129  | CHARGE = 1.0 |
| H | 15 | (CENTRE 15) | -1.55692012 | -1.91406023 | 3.31782461  | CHARGE = 1.0 |
| H | 16 | (CENTRE 16) | 1.58706100  | -1.92302535 | 3.27769640  | CHARGE = 1.0 |
| B | 17 | (CENTRE 17) | -5.33956114 | -3.55156005 | 0.23080100  | CHARGE = 5.0 |
| H | 18 | (CENTRE 18) | -3.28151035 | -4.46700043 | -0.19714943 | CHARGE = 1.0 |
| H | 19 | (CENTRE 19) | -5.40156597 | -2.26693342 | 2.13568831  | CHARGE = 1.0 |
| H | 20 | (CENTRE 20) | -4.47674474 | -0.19200344 | -2.23885083 | CHARGE = 1.0 |
| N | 21 | (CENTRE 21) | -5.85189932 | -1.55483564 | -2.11782510 | CHARGE = 7.0 |
| H | 22 | (CENTRE 22) | -7.54740268 | -0.65958327 | -1.91117831 | CHARGE = 1.0 |
| H | 23 | (CENTRE 23) | -7.04407009 | -5.07044693 | 0.13240883  | CHARGE = 1.0 |
| H | 24 | (CENTRE 24) | -5.89218877 | -2.48300334 | -3.80782604 | CHARGE = 1.0 |
| B | 25 | (CENTRE 25) | 5.32337295  | -3.58013626 | 0.18368396  | CHARGE = 5.0 |
| H | 26 | (CENTRE 26) | 3.26078695  | -4.47917195 | -0.25644036 | CHARGE = 1.0 |
| H | 27 | (CENTRE 27) | 7.02203500  | -5.10300946 | 0.05232618  | CHARGE = 1.0 |
| H | 28 | (CENTRE 28) | 5.39570478  | -2.33317456 | 2.11328947  | CHARGE = 1.0 |
| N | 29 | (CENTRE 29) | 5.83812816  | -1.54028369 | -2.12691435 | CHARGE = 7.0 |
| H | 30 | (CENTRE 30) | 5.87796175  | -2.43719186 | -3.83372979 | CHARGE = 1.0 |
| H | 31 | (CENTRE 31) | 7.53455562  | -0.65081924 | -1.90339829 | CHARGE = 1.0 |

H 32 (CENTRE 32) 4.46439498 -0.17413693 -2.22459633 CHARGE = 1.0

## 2. Crystal geometry

Optimization: Heavy atoms frozen, hydrogen-atom positions optimized

### Input

|                       |
|-----------------------|
| 1<br>diHB-crystal.wfn |
|-----------------------|

### Geometry

|   |    |             |             |             |             |              |
|---|----|-------------|-------------|-------------|-------------|--------------|
| N | 1  | (CENTRE 1)  | 0.00000150  | 4.86874151  | -0.14750490 | CHARGE = 7.0 |
| N | 2  | (CENTRE 2)  | -0.00000179 | -4.08300818 | 2.11977450  | CHARGE = 7.0 |
| N | 3  | (CENTRE 3)  | -5.09718264 | -1.03226134 | -3.51270679 | CHARGE = 7.0 |
| N | 4  | (CENTRE 4)  | 5.09718309  | -1.03226424 | -3.51270594 | CHARGE = 7.0 |
| B | 5  | (CENTRE 5)  | 0.00000181  | 6.04274229  | 2.60718755  | CHARGE = 5.0 |
| B | 6  | (CENTRE 6)  | -0.00000149 | -2.91013112 | 4.87459459  | CHARGE = 5.0 |
| B | 7  | (CENTRE 7)  | -5.09834255 | -0.75459226 | -0.53126239 | CHARGE = 5.0 |
| B | 8  | (CENTRE 8)  | 5.09834188  | -0.75459516 | -0.53126154 | CHARGE = 5.0 |
| H | 9  | (CENTRE 9)  | 1.56740642  | 5.39762028  | -1.13615868 | CHARGE = 1.0 |
| H | 10 | (CENTRE 10) | 1.58073316  | -3.47916018 | 1.18258505  | CHARGE = 1.0 |
| H | 11 | (CENTRE 11) | -6.72971140 | -1.87031055 | -4.12082948 | CHARGE = 1.0 |
| H | 12 | (CENTRE 12) | 3.64219315  | -2.11138035 | -4.17882849 | CHARGE = 1.0 |
| H | 13 | (CENTRE 13) | -3.64219140 | -2.11137581 | -4.17882919 | CHARGE = 1.0 |
| H | 14 | (CENTRE 14) | 6.72971282  | -1.87031168 | -4.12082851 | CHARGE = 1.0 |
| H | 15 | (CENTRE 15) | -1.56737305 | 5.39766832  | -1.13618107 | CHARGE = 1.0 |
| H | 16 | (CENTRE 16) | -1.58073679 | -3.47916026 | 1.18258515  | CHARGE = 1.0 |
| H | 17 | (CENTRE 17) | 1.91229178  | 5.29605486  | 3.61378198  | CHARGE = 1.0 |
| H | 18 | (CENTRE 18) | 1.91007610  | -3.68342743 | 5.89513783  | CHARGE = 1.0 |
| H | 19 | (CENTRE 19) | -6.89888730 | 0.53616146  | -0.00036571 | CHARGE = 1.0 |
| H | 20 | (CENTRE 20) | 3.09702624  | 0.23956311  | -0.01463887 | CHARGE = 1.0 |
| H | 21 | (CENTRE 21) | -3.09702831 | 0.23956822  | -0.01463862 | CHARGE = 1.0 |

|   |    |             |             |             |             |              |
|---|----|-------------|-------------|-------------|-------------|--------------|
| H | 22 | (CENTRE 22) | 6.89888532  | 0.53616047  | -0.00036459 | CHARGE = 1.0 |
| H | 23 | (CENTRE 23) | -1.91232474 | 5.29611317  | 3.61375691  | CHARGE = 1.0 |
| H | 24 | (CENTRE 24) | -1.91007866 | -3.68342783 | 5.89513836  | CHARGE = 1.0 |
| H | 25 | (CENTRE 25) | -0.00002780 | 2.93972143  | -0.00577422 | CHARGE = 1.0 |
| H | 26 | (CENTRE 26) | 0.00003824  | 8.32687698  | 2.29184998  | CHARGE = 1.0 |
| H | 27 | (CENTRE 27) | -0.00000176 | -6.00978890 | 2.15885598  | CHARGE = 1.0 |
| H | 28 | (CENTRE 28) | -0.00000178 | -0.63803101 | 4.60552116  | CHARGE = 1.0 |
| H | 29 | (CENTRE 29) | -4.99999818 | 0.67964776  | -4.40151662 | CHARGE = 1.0 |
| H | 30 | (CENTRE 30) | -5.26213377 | -2.89699843 | 0.27348384  | CHARGE = 1.0 |
| H | 31 | (CENTRE 31) | 4.99999681  | 0.67964465  | -4.40151596 | CHARGE = 1.0 |
| H | 32 | (CENTRE 32) | 5.26213548  | -2.89700122 | 0.27348468  | CHARGE = 1.0 |

#### D. High affinity host-guest complexes

##### Calculation details

Promolecular density

Docking performed by AutoDock and optimization of the geometry performed with NAMD.

##### Input

```
2
cb7.xyz
bcb.xyz
LIGAND 2 5
```

##### Geometry

Geometry taken from : Moghaddam, S.; Inoue, Y.; Gilson, M. K. *J. Am. Chem. Soc.* **2009**, *131*, 4012.

- BCB

|   |          |         |          |
|---|----------|---------|----------|
| C | 11.92700 | 7.10200 | 10.39300 |
| C | 13.24600 | 7.04800 | 11.17100 |
| H | 13.64400 | 8.05200 | 11.30800 |
| H | 13.05900 | 6.64300 | 12.16500 |
| C | 14.26600 | 6.16900 | 10.43900 |
| H | 14.99000 | 6.79600 | 9.91700  |
| H | 14.83200 | 5.55800 | 11.14200 |
| C | 13.53800 | 5.28300 | 9.42500  |
| C | 12.34400 | 4.64900 | 10.13700 |
| H | 12.70000 | 4.19000 | 11.06000 |
| H | 11.91300 | 3.85100 | 9.53300  |
| C | 11.29400 | 5.71200 | 10.46000 |
| H | 10.86500 | 5.52800 | 11.44200 |
| H | 10.48900 | 5.65400 | 9.73200  |
| C | 13.01000 | 6.20300 | 8.31500  |
| H | 12.35200 | 5.63900 | 7.65400  |
| H | 13.83700 | 6.57000 | 7.71100  |
| C | 12.25300 | 7.39100 | 8.92500  |
| H | 11.34400 | 7.58900 | 8.35600  |
| H | 12.85800 | 8.29500 | 8.86200  |
| C | 11.00000 | 8.16900 | 10.99700 |
| H | 11.51200 | 9.13200 | 11.04400 |
| H | 10.73900 | 7.89700 | 12.01800 |
| O | 9.79900  | 8.35100 | 10.28200 |
| H | 9.40100  | 7.48600 | 10.19000 |
| C | 14.43100 | 4.15800 | 8.87400  |
| H | 14.38300 | 3.28900 | 9.53200  |
| H | 14.07100 | 3.83900 | 7.89600  |
| O | 15.78500 | 4.51500 | 8.74000  |
| H | 15.87200 | 4.93600 | 7.89100  |

- CB7

126

D 7.99900 6.25900 9.66100  
C 7.97600 5.06000 9.47400  
N 7.99200 4.44600 8.27100  
N 7.82800 4.11500 10.43300  
C 7.99300 2.99600 8.37800  
C 7.88900 2.76700 9.89500  
H 7.17000 2.54700 7.82300  
H 7.01100 2.17600 10.17700  
N 9.27500 2.38400 8.04600  
N 9.13200 2.08200 10.21700  
C 9.89600 1.86900 9.12100  
D 10.92800 1.21200 9.09100  
C 7.42700 4.39600 11.81000  
H 6.87600 5.33800 11.84600  
H 6.72200 3.62800 12.13200  
C 9.37700 1.49800 11.53200  
H 10.04800 0.63900 11.44400  
H 8.43900 1.10900 11.93100  
D 8.73500 6.70000 12.95700  
C 9.04600 5.57400 13.28100  
N 8.54400 4.43600 12.75700  
N 9.92000 5.24400 14.26200  
C 9.09000 3.23800 13.37500  
C 10.09300 3.80600 14.39300  
H 8.31600 2.62900 13.83800  
H 9.89600 3.46800 15.41500  
N 9.93700 2.46200 12.48100  
N 11.37400 3.31600 13.90400

C 11.23900 2.56500 12.78600  
D 12.15100 2.00300 12.19700  
C 10.43800 6.20000 15.24200  
H 9.82000 7.10000 15.24100  
H 10.32600 5.77000 16.23700  
C 12.58700 3.36100 14.71500  
H 12.32500 3.15400 15.75400  
H 13.26600 2.55700 14.41400  
D 11.53600 8.67000 14.20500  
C 12.24900 7.79600 14.64100  
N 11.84700 6.57300 15.05600  
N 13.58400 7.89700 14.85000  
C 12.94400 5.74900 15.53600  
H 12.78400 5.41400 16.55800  
C 14.16000 6.68200 15.39300  
H 14.66400 6.86400 16.34600  
N 13.29100 4.64400 14.65200  
N 15.02100 5.98000 14.45700  
C 14.45500 4.83400 14.01200  
D 14.96400 4.05500 13.22100  
C 14.32800 9.15300 14.75600  
H 14.93900 9.25700 15.65000  
H 13.63700 9.99600 14.77700  
C 16.43300 6.31200 14.30200  
H 16.81800 6.66400 15.26000  
H 17.00000 5.40900 14.06500  
D 13.84800 10.54400 12.26400  
C 14.91000 10.01900 12.49900  
N 15.20000 9.26100 13.58100  
N 16.03800 10.13600 11.75000  
C 16.56400 8.76000 13.57500  
H 17.09800 9.03200 14.48100

C 17.16000 9.40300 12.30900  
H 18.00300 10.06500 12.53200  
N 16.67900 7.33500 13.28500  
N 17.56900 8.26200 11.50800  
C 17.24500 7.08700 12.09300  
O 17.51400 5.98300 11.64600  
C 16.17800 11.06400 10.62800  
H 15.39700 11.82600 10.67900  
H 17.11800 11.60400 10.73600  
C 18.46400 8.38600 10.36100  
H 19.14000 9.22700 10.52200  
H 19.09700 7.49700 10.28200  
O 13.97100 10.82900 8.77800  
C 15.08300 10.46900 8.47900  
N 16.15300 10.42800 9.30600  
N 15.49600 10.09200 7.24200  
C 17.35100 9.91600 8.65600  
H 18.17600 10.62000 8.70800  
C 16.87500 9.65200 7.21600  
H 17.46000 10.20200 6.47300  
N 17.73700 8.58800 9.10800  
N 17.03200 8.21500 7.06100  
C 17.54300 7.64000 8.17500  
O 17.85800 6.46500 8.27800  
C 14.72600 10.32200 6.02300  
H 13.99200 11.11200 6.19500  
H 15.39600 10.70000 5.25300  
C 16.92600 7.54500 5.76600  
H 17.35700 8.19000 5.00100  
H 17.53000 6.63600 5.76500  
O 11.95300 9.59600 6.26600  
C 12.72300 8.93800 5.60200

N 14.05200 9.13100 5.51200  
N 12.39300 7.91800 4.78000  
C 14.71700 8.16000 4.65400  
H 15.25300 8.63400 3.83900  
C 13.54700 7.28000 4.17700  
H 13.46600 7.24100 3.08600  
N 15.55000 7.21700 5.38500  
N 13.85000 5.97200 4.74300  
C 15.01000 5.98900 5.44500  
D 15.51900 5.02100 5.98900  
C 11.02700 7.63000 4.36600  
H 10.39700 8.51000 4.52000  
H 11.02100 7.44300 3.29100  
C 13.15800 4.75000 4.31700  
H 13.81800 3.88900 4.45100  
H 12.97500 4.81300 3.24300  
D 9.27800 7.57600 6.67800  
C 9.56100 6.57100 6.05800  
N 10.46000 6.47800 5.05800  
N 8.98300 5.35900 6.21900  
C 10.63200 5.12300 4.56200  
H 10.49900 5.06400 3.48400  
C 9.56200 4.34900 5.34900  
H 8.81000 3.89500 4.69900  
N 11.87600 4.49200 4.99500  
N 10.33000 3.34800 6.06600  
C 11.66300 3.49100 5.86900  
D 12.52000 2.76100 6.34400  
C 7.77100 5.13800 7.00000  
H 7.27000 6.09000 7.18300  
H 7.07200 4.55300 6.40000  
C 9.70300 2.17300 6.66300

H 10.38800 1.32300 6.61500

H 8.83300 1.89500 6.06600

## E. Protein-ligand

### Calculation details

Promolecular density

### Input

```
2
v5x.xyz
2v5x.xyz
LIGAND 1 5.
INCREMENTS 0.2 0.2 0.2
```

### Geometry

Obtained from 2v5x.pdb
